# Supplementary material for: Preliminary safety data from a randomised trial of early versus standard timing of administration of measles-rubella vaccine in Ugandan infants
Source: Discov Med (Singap). 2026 Jul 30;3(1):92. doi: 10.1007/s44337-026-00649-x (PMC13424465; doi:10.1007/s44337-026-00649-x)
Supplement: Supplementary file 5 — Supplementary Material 5. [file 44337_2026_649_MOESM5_ESM.xlsx]

## Sheet: Sheet 1
rand_participantid
